# Supplementary material
Source: PubMed Central journal article supplement (PMC4136228)

1A

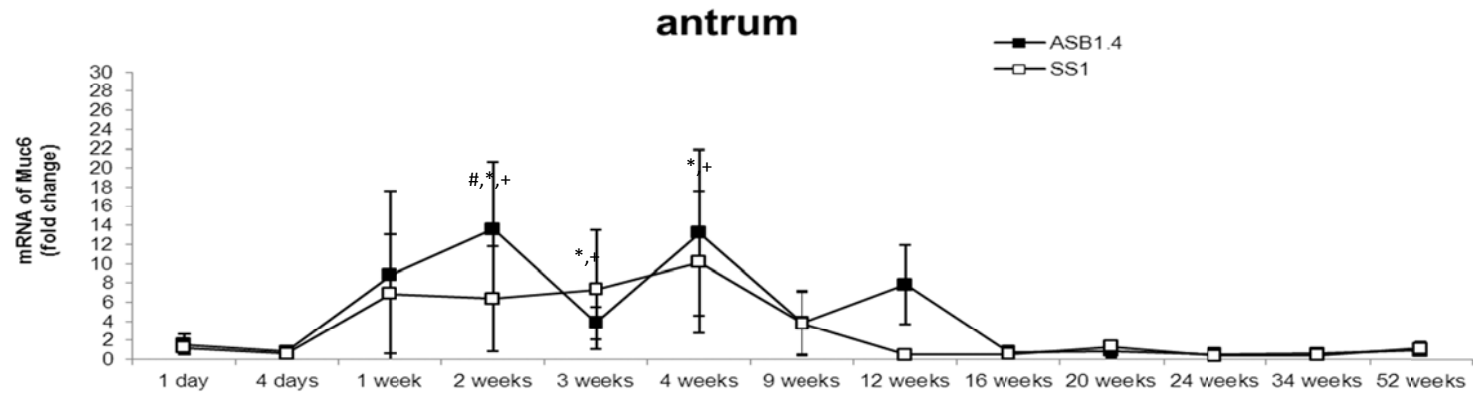

1B

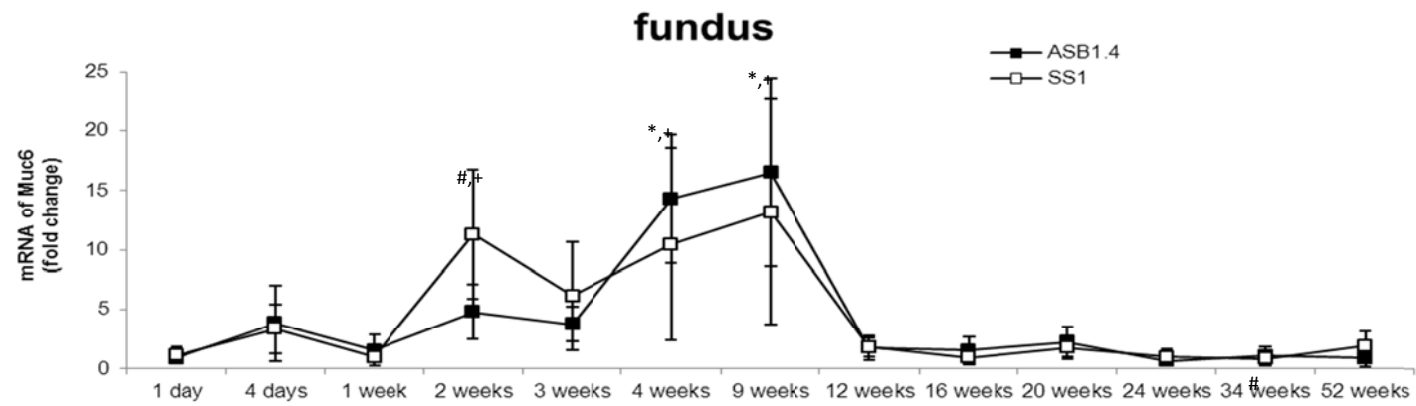

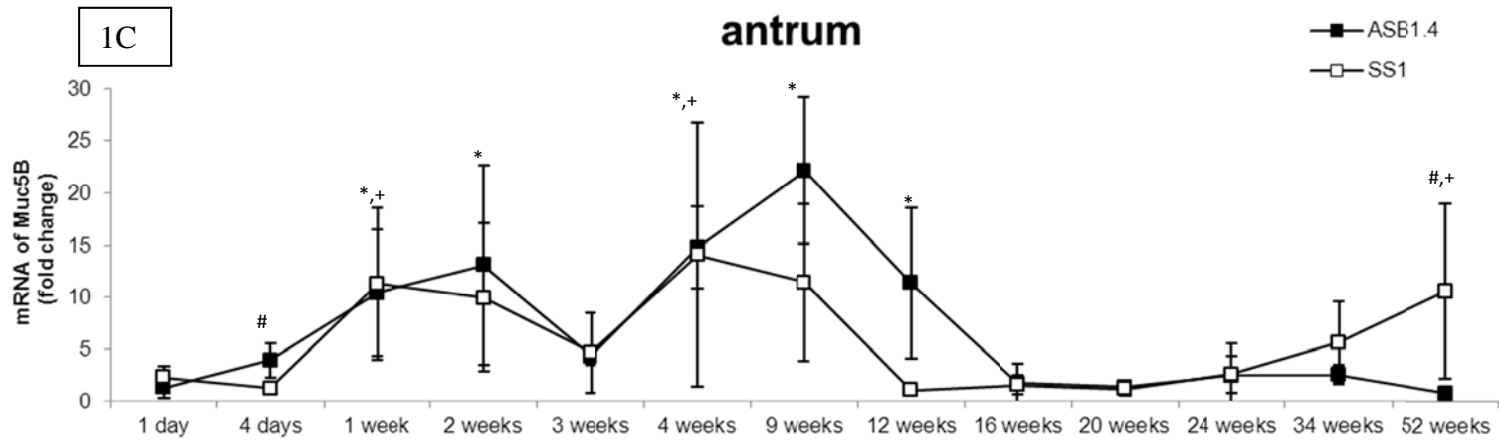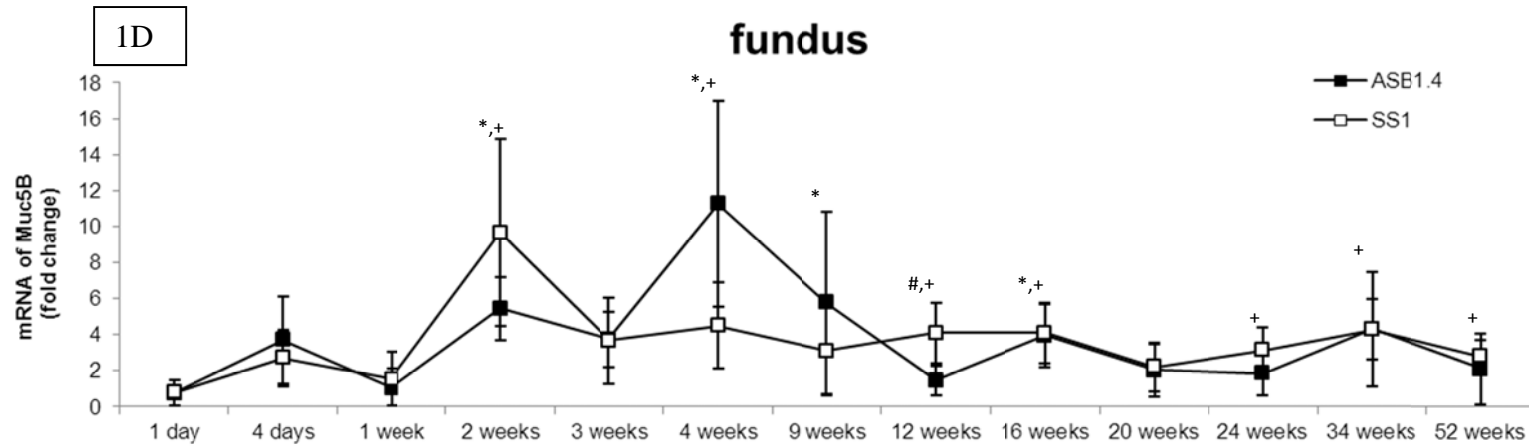

1E

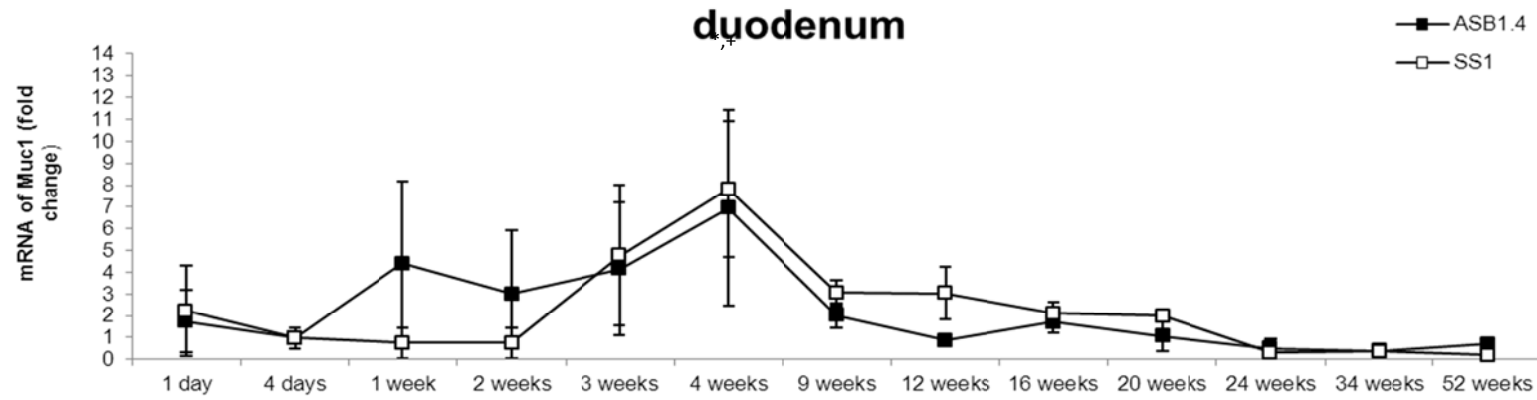

1F

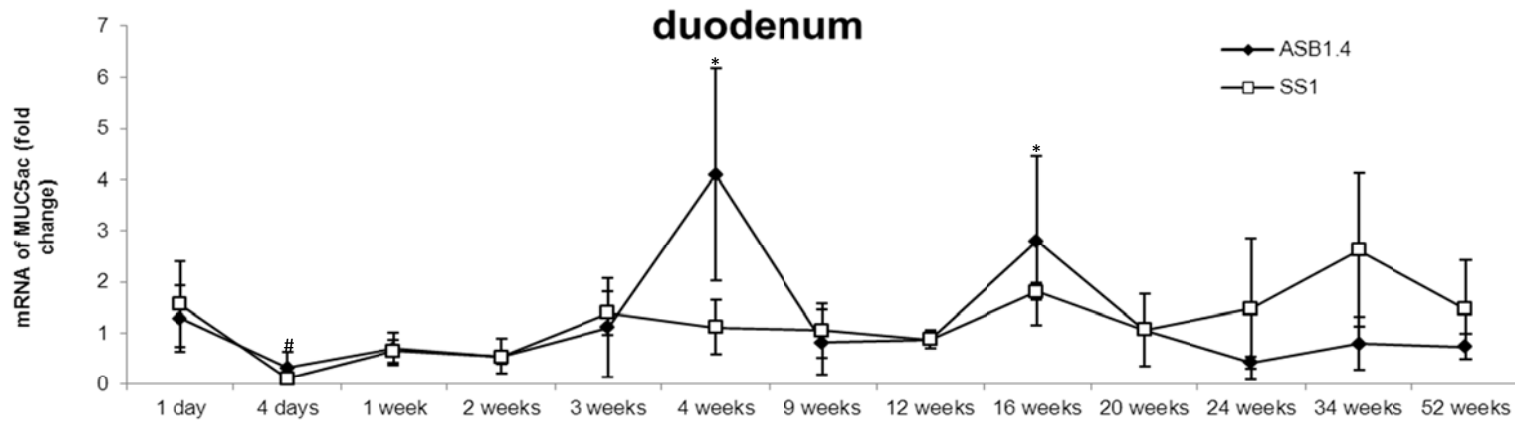

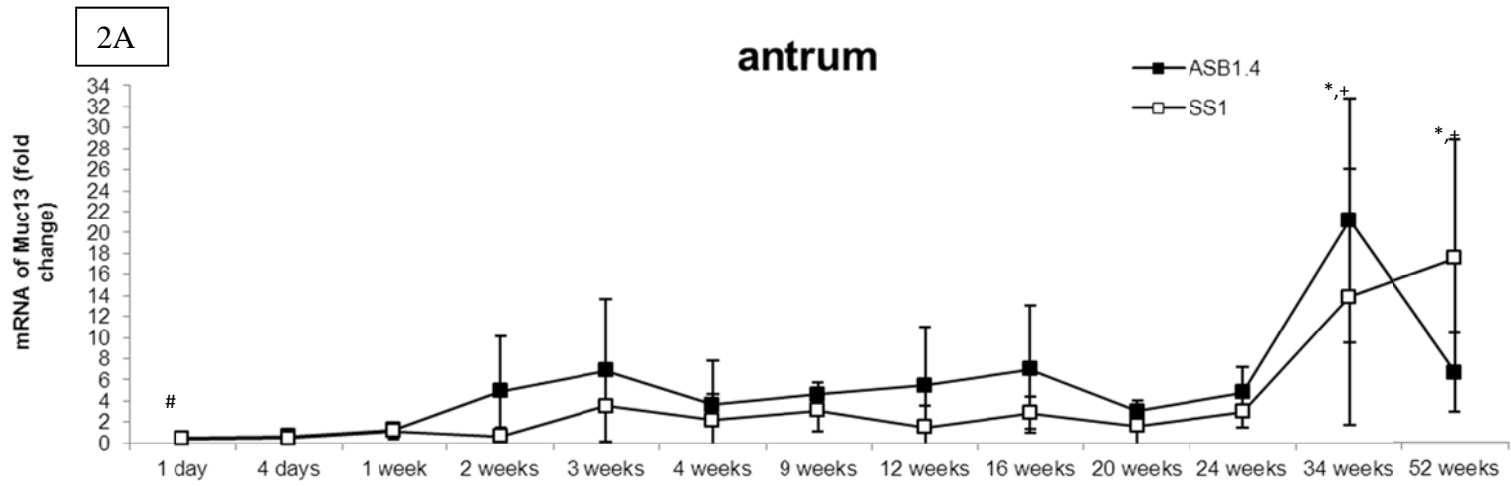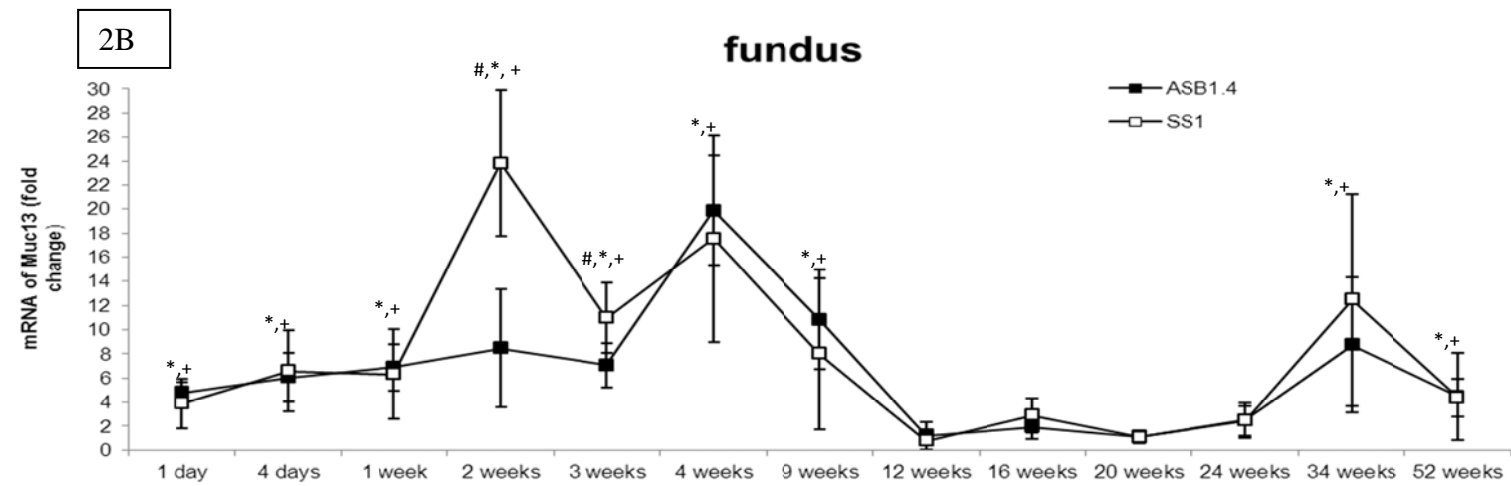

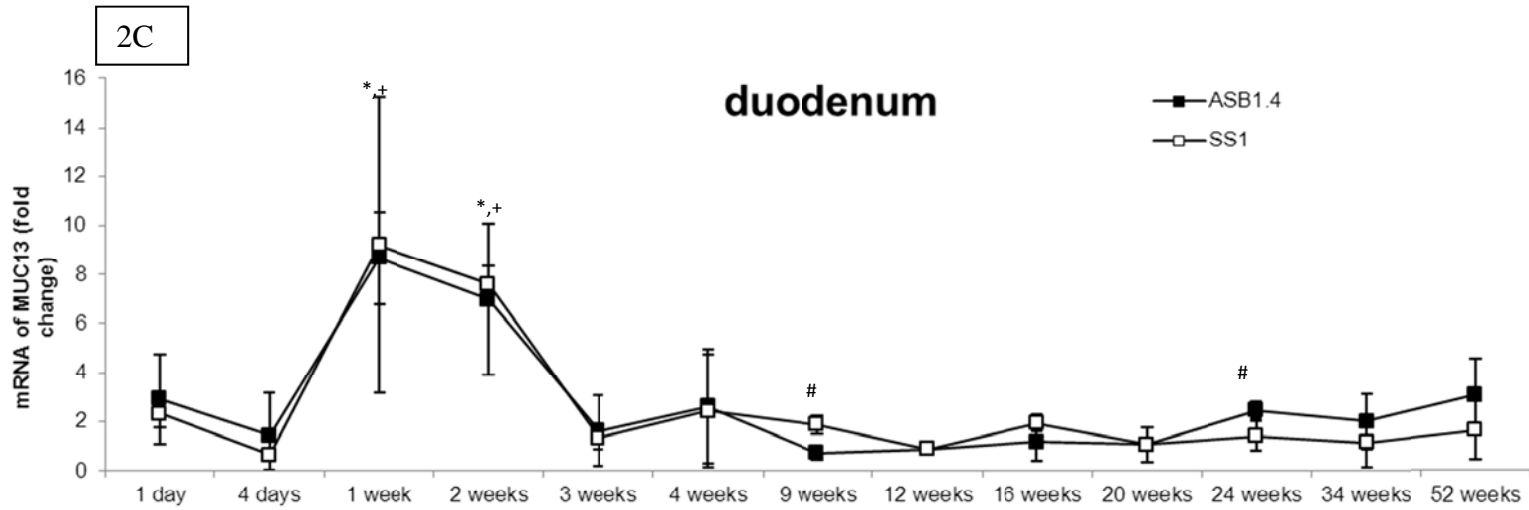

3

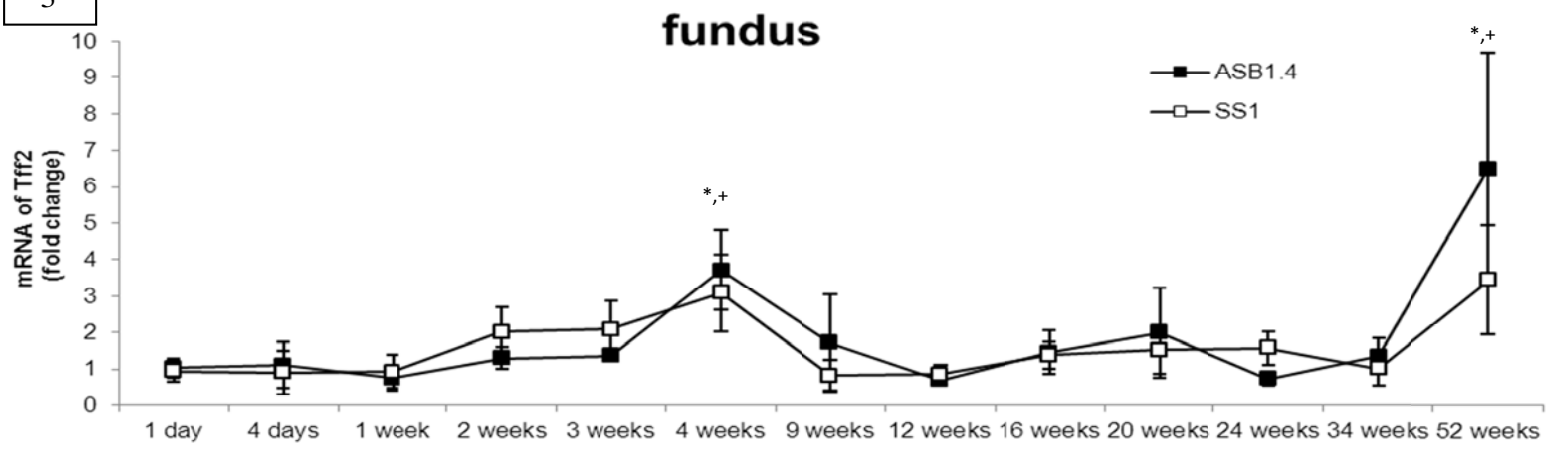

Supplement: IAI.01867-14_zii999090783so3.pdf [file IAI.01867-14_zii999090783so3.pdf]
